# Supplementary material
Source: PubMed Central journal article supplement (PMC10015303)
Supplement: jama-e231044-s001.pdf [file jama-e231044-s001.pdf]

## Data Sharing Statement

Sarraj. Appropriateness of Cardiovascular Disease Prevention Recommendations Obtained From a Popular Online Chat-based Artificial Intelligence Model. *JAMA*. Published February 03, 2023. doi:10.1001/jama.2023.1044

### Data

**Data available:** No

### Additional Information

**Explanation for why data not available:** Data will be available in the article
